# Supplementary material
Source: Springer Nature journal article supplement (https://www.springermedizin.de/resource/supplementary/12882_2012_342_MOESM4_ESM.pdf/9453688)

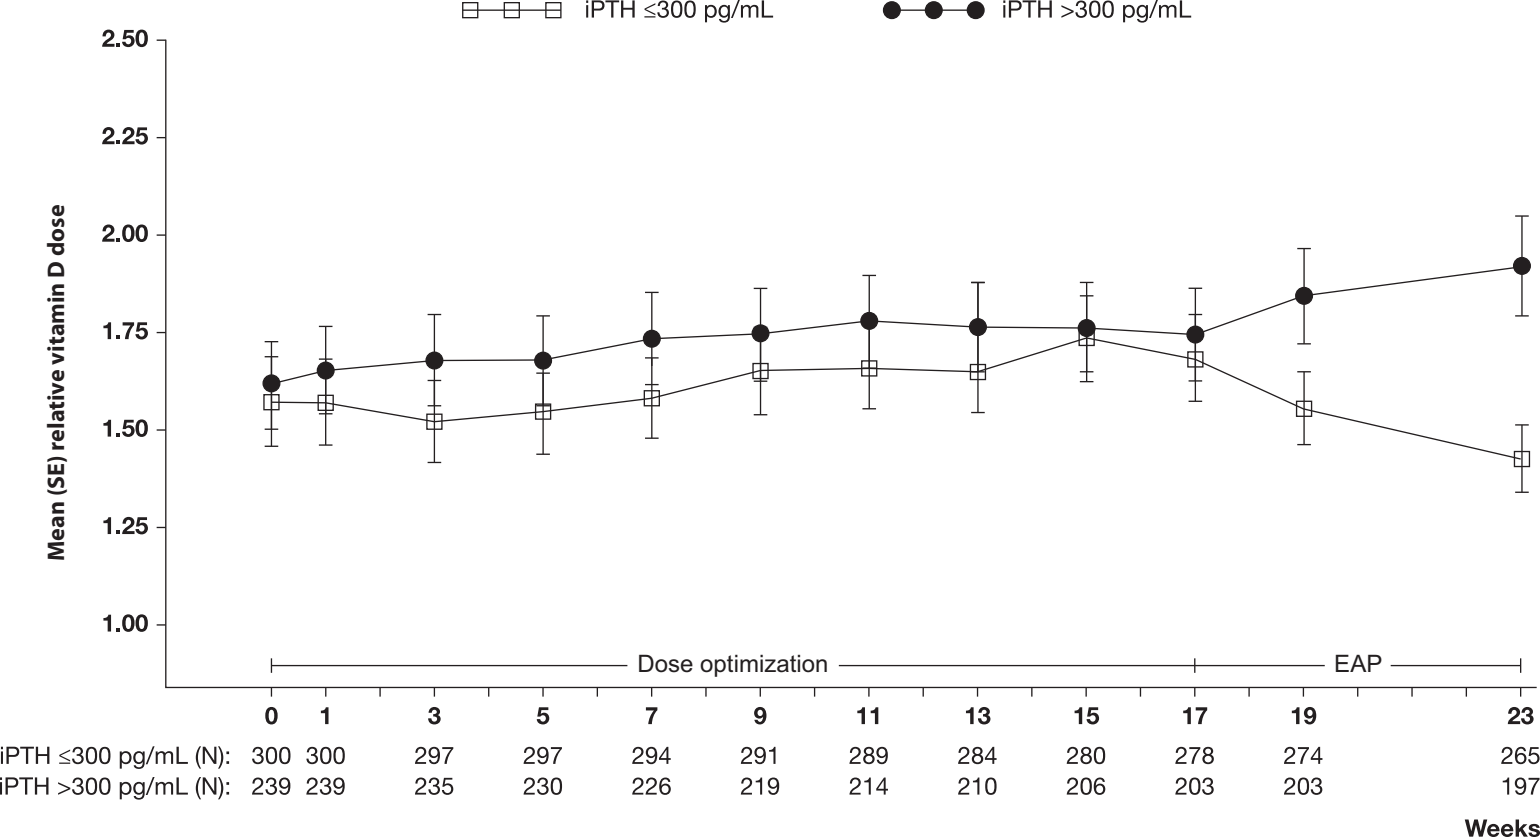

Supplement: MOESM4 [file 9453688]
